# Supplementary material
Source: PubMed Central journal article supplement (PMC2964099)
Supplement: supp_137.21.3697_DEV051664-Table_S1.pdf [file supp_137.21.3697_DEV051664-Table_S1.pdf]

**Table S1. Primers used for real time PCR**

| Gene     | Forward primer                  | Reverse primer                 | T <sub>A</sub> |
|----------|---------------------------------|--------------------------------|----------------|
| ODC      | 5'-TATGTGATGTCAAGACCAGCATG-3'   | 5'-GATACTCAATTCACACTTTCACAG-3' | 63°C           |
| Chordin  | 5'-CTCATCAAATGTGCCATCTGCACC-3'  | 5'-TGCCAGCTCTCGTTGTTGAGGTA-3'  | 65°C           |
| Fstl1    | 5'-CAACCTGGTCAAGACTTGACTGA-3'   | 5'-TTACATCTCCTTGGTGCTCATCT-3'  | 63°C           |
| Fst      | 5'-CTTATCCGAGCGAGTGTGCCATG-3'   | 5'-CTGGTCTTCATCTTCTCTTCTT-3'   | 63°C           |
| Shh      | 5'-ACTGGGTCTACTACGAGTCCAAG-3'   | 5'-AGCTTGGTGCCTCCATGCTCCA-3'   | 60°C           |
| Patched1 | 5'-GAGGAGCTCCATCATTATGAG-3'     | 5'-CTTGACTGATGCCTTGACTCT-3'    | 60°C           |
| Vegf     | 5'-AAGCACTTGTGTTTGTACAAGATCC-3' | 5'-TGTTCCCCTTCTTTTCCGCT-3'     | 60°C           |
| hVegf    | 5'-AGGAGGAGGGCAGAATCATCA-3'     | 5'-GGGTTGAAGATGTACTCGATC-3'    | 60°C           |
| Fgf2     | 5'-AGCAGAAGAAAGAGGAGTAGTAT-3'   | 5'-GAAACATTCCTCTGTTGCACATT-3'  | 63°C           |
| β-Actin  | 5'-CTGTCTGGATTGGAGGCTCTATC-3'   | 5'-CAGTCCGGTTTAGAAGCATTTGC-3'  | 60°C           |
| Noggin   | 5'-CCTATACACGTGGAACGATCTCG-3'   | 5'-CAGGTTTGACAGCCATGCCTTCT-3'  | 63°C           |
| TGFβ3    | 5'-GTCCATGAGCCTAAAGGCTACTT-3'   | 5'-AACATAGTACAAGATCGTCAGTG-3'  | 63°C           |
| Bmp2     | 5'-CAAGAGGCACGTTAGGATTAGC-3'    | 5'-GCTTGACGCTTTTCTCTTTGT-3'    | 60°C           |
| Bmp4     | 5'-CAGGAGATCAGCCTGCAGTAC-3'     | 5'-TGCTGAGGTTGAAGACGAAGC-3'    | 60°C           |
| Sema3a   | 5'-TGGAGTAGAGAATAGCAGCAC-3'     | 5'-TGTCGGATCATTTCGATCATC-3'    | 60°C           |
| Sema3d   | 5'-CTGCCAGAGACCCATACTGTG-3'     | 5'-GCAGTTTCATGACTAATGCTG-3'    | 60°C           |
| Sema3e   | 5'-GCGAGCCCATGAAACTAAGAAG-3'    | 5'-ATGCTGTGTTCCACTGTCTGAC-3'   | 60°C           |
| Sema3f   | 5'-ACCCATCAAGATGATGACCATC-3'    | 5'-CAGGCTTCTCCATACACGTCA-3'    | 60°C           |
