# Supplementary material
Source: PubMed Central journal article supplement (PMC2964099)
Supplement: supp_137.21.3697_DEV051664-Table_S4.pdf [file supp_137.21.3697_DEV051664-Table_S4.pdf]

**Table S4. Fusion of the dorsal aortae in quail embryos in ovo compared with New cultured sibling embryos**

| Stage | Somite position at fusion in New culture | Somite position at fusion in ovo |
|-------|------------------------------------------|----------------------------------|
| 11    | No fusion ( <i>n</i> =13)                | No fusion                        |
| 12    | 9.3 ( <i>n</i> =14)                      | No fusion                        |
| 13    | 11.5 ( <i>n</i> =16)                     | 10.5 ( <i>n</i> =13)             |
| 14    | 13.7 ( <i>n</i> =3)                      | 13.2 ( <i>n</i> =7)              |
